# Supplementary material
Source: HighWire-hosted journal article supplement (https://www.annfammed.org/highwire/filestream/7814/field_highwire_adjunct_files/1/Nutting_Suppl_Fig_2.pdf)
Supplement: Nutting_Suppl_Fig_2.pdf [file Nutting_Suppl_Fig_2.pdf]

Nutting PA, Dickinson LM, Rubenstein L, Elliott CE, Keeley RD. Improving detection of suicidal ideation among depressed patients in primary care. *Ann Fam Med*. 2005;3:529-536.

<http://www.annfammed.org/cgi/content/full/3/6/529/DC1>

**Supplemental Figure 2. MHAP CONSORT sample flow.**

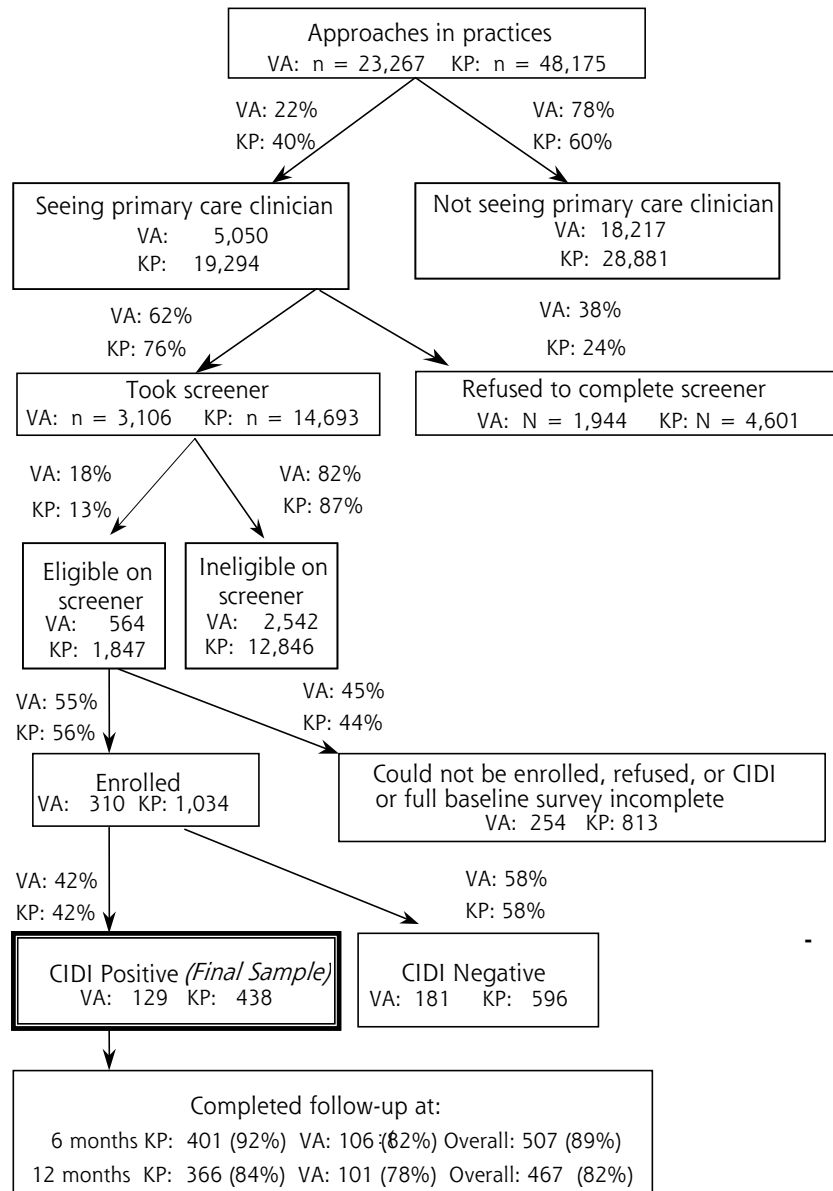

MHAP = Mental Health Awareness Project; CONSORT = Consolidated Standards of Reporting Trials; VA = participating Veterans Administration practices; KP = participating practices from Kaiser Permanente Medical Care Program of Northern California; CIDI = World Health Organization Composite International Diagnostic Interview for Primary Care.

Note: The 466 patients the MHAP study contributed to this analysis comes from the 507 patients who were followed up at 6 months, and had all the data items required for this analysis.
